# Supplementary material for: Development of a Salutogenesis Workshop for SPPs to Help Them, Their Athletes, and the Athlete’s Entourage Better Cope With Uncertainty During the COVID-19 Pandemic
Source: PubMed Central journal article supplement (PMC8177668; doi:10.3389/fpsyg.2021.612264), 2021-05-21
Supplement: Data_Sheet_1.pdf [file Data_Sheet_1.pdf]

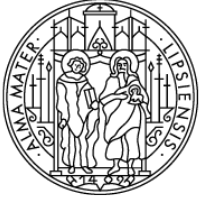

UNIVERSITÄT  
LEIPZIG

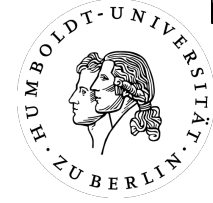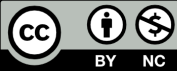

# COPING WITH UNCERTAINTY

A workshop to apply Salutogenesis in sports to cope with a crisis of uncertainty

<sup>1</sup>Sascha Leisterer, <sup>1,2</sup>Franziska Lautenbach, <sup>1</sup>Nadja Walter, <sup>1</sup>Lara Kronenberg, & <sup>1</sup>Anne-Marie Elbe

<sup>1</sup>*Leipzig University (Germany)  
Faculty of Sports Science  
Institute of Sport Psychology and Sport Pedagogy  
Department of Sport Psychology*

<sup>2</sup>*Humboldt-Universität zu Berlin (Germany)  
Faculty of Humanities and Social Sciences  
Department of Sport Psychology and Sport Pedagogy  
Sport Psychology*

## Learning objectives

After this workshop you will be able to ...

### 1. Welcome & Introduction

### 2. Knowledge acquisition

### 3. Knowledge transfer

### 4. Knowledge application

### 5. Perspective taking

### 6. Evaluation & Farewell

- ...describe and define the salutogenetic approach
- ...identify SoC's relevance for health promotion and performance enhancement
- ...differentiate between the three SoC components
- ...identify strategies that can be applied to strengthen the SoC components
- ...check and evaluate psychological counseling guidelines and strategies (e.g., Bertollo et al., 2020) published during the COVID19 pandemic for completeness
- ...develop coping strategies based on the salutogenetic approach
- ...identify and explain differences in coping strategies according to the SoC components
- ...apply the developed strategies to the elite sport setting
- ...put themselves in the place of the athlete /the learner and to consider different barriers during the learning process

1. Welcome & Introduction **Longitudinal, multifaceted, unpredictable, noncontrolled change-event:**

2. Knowledge acquisition

3. Knowledge transfer

4. Knowledge application

5. Perspective taking

6. Evaluation & Farewell

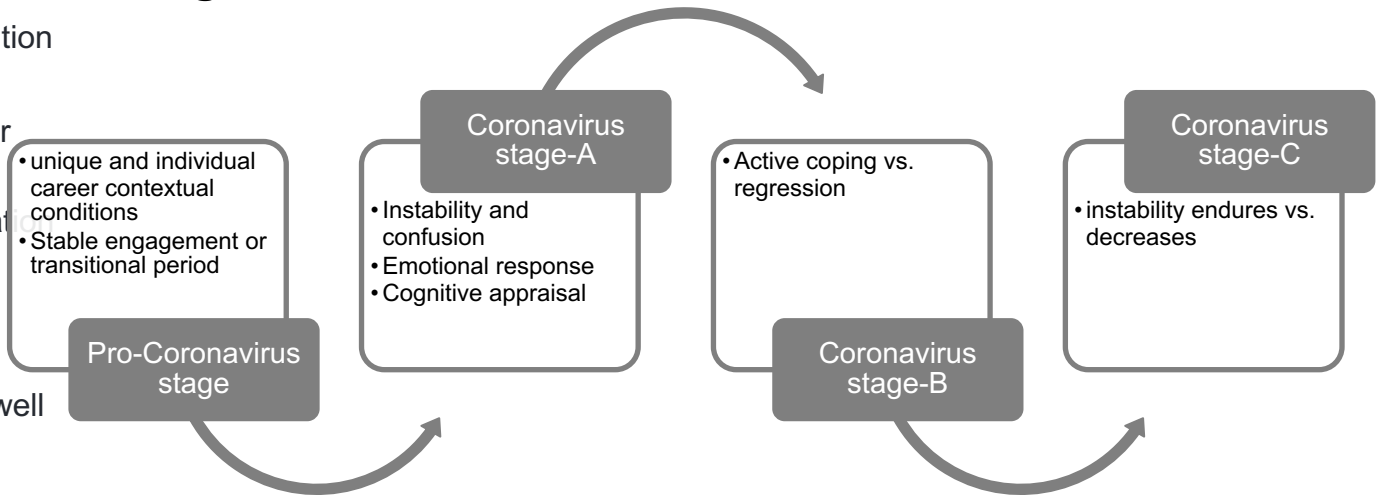

(Samuel et al., 2020)

1. **Welcome & Introduction** **Athletes and their social support network face an uncertain future due to:**
2. Knowledge acquisition
3. Knowledge transfer
4. Knowledge application — **Stress due to instability and confusion**
5. Perspective taking — **Active coping vs. regression**
6. Evaluation & Farewell — **Unforeseeable instability**

**Figure 1**

Crisis of uncertainty for athletes and their social network, e.g., sport psychological practitioners (SPP).

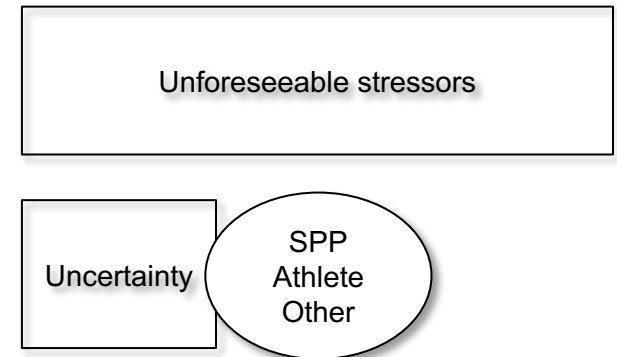

1. Welcome & Introduction Imagine a river. You jump in and you float with its' flow.  
Suddenly, a stream pulls you under the surface.
2. **Knowledge acquisition** Panic!
3. Knowledge transfer Someone at the bank may help you to get out of the water.
4. Knowledge application
5. Perspective taking **But the question is not:** “What does the helper need to assist you?”
6. Evaluation & Farewell

**The salutogenetic question is:** “What could have been done before jumping in a river to help yourself?”

(Antonovsky, 1993a)

- 1. Welcome & Introduction
  - 2. **Knowledge acquisition** – **Comprehensibility** refers to the cognitive component of the SoC and encompasses being able to identify stressors correctly and choosing an appropriate coping strategy.
  - 3. Knowledge transfer – **Manageability** relates to a feeling of self-efficacy and illustrates a feeling of trust in one's coping skills to effectively manage stressors.
  - 4. Knowledge application
  - 5. Perspective taking – **Meaningfulness** describes a motivational-emotional drive, which supports individuals in activating a specific coping strategy and in identifying a stressor as an acceptable challenge.
  - 6. Evaluation & Farewell
- (Antonovsky, 1993b)

**Figure 2**

SoC support to cope with the unforeseeable.

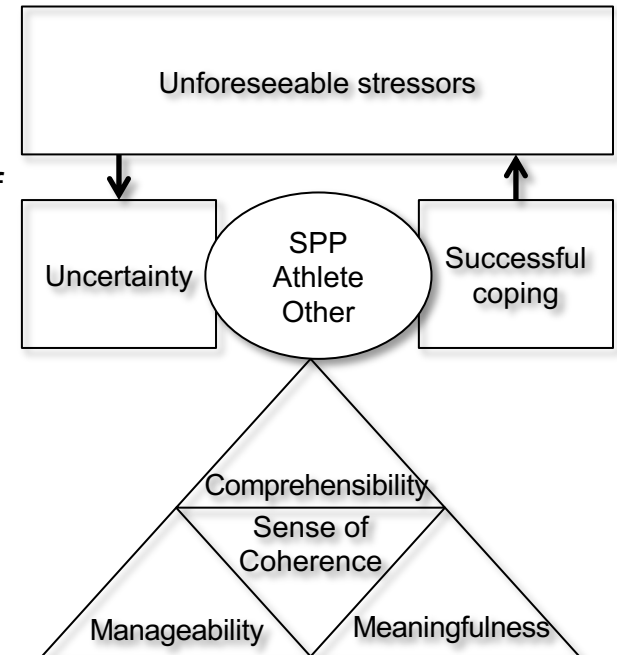

## COVID 19 = career transition barrier

1. Welcome & Introduction
2. **Knowledge acquisition**
  - Unanticipated
  - Shared
3. Knowledge transfer
  - Uncertainty
4. Knowledge application
  - External
  - Possibility of a serious illness
5. Perspective taking
6. Evaluation & Farewell

(Stambulova etl al., 2020)

## Scenarios for Olympic and Paralympic athletes:

1. Welcome & Introduction

2. Knowledge acquisition

**#1**

It is a good time for me to retire now.

3. Knowledge transfer

4. Knowledge application

**#2**

I can take a pause and strategically prepare for the next Olympic/Paralympic Games

5. Perspective taking

6. Evaluation & Farewell

**#3**

COVID 19 won't stop me to prepare for Tokyo 2020.

(Stambulova etl al., 2020)



## Stress due to the COVID19 pandemic

1. Welcome & Introduction **Table 1.** Means (and standard deviations) of perceived stress, functional and dysfunctional psychobiosocial states prior to and during COVID-19 pandemic.

| 2. Knowledge acquisition | Prior to COVID-19                    |              | During COVID-19 |              |              |
|--------------------------|--------------------------------------|--------------|-----------------|--------------|--------------|
|                          | Women                                | Men          | Women           | Men          |              |
| 3. Knowledge transfer    | Perceived stress                     | 13.70 (6.60) | 12.10(5.90)     | 19.50 (5.86) | 16.63 (5.58) |
|                          | Functional psychobiosocial states    | 2.56 (0.53)  | 2.65 (0.60)     | 1.86 (0.69)  | 2.04 (0.72)  |
|                          | Dysfunctional psychobiosocial states | 0.87 (0.46)  | 0.87 (0.51)     | 1.46 (0.73)  | 1.29 (0.74)  |

4. Knowledge application  
 Notes: Prior to COVID-19 sample for perceived stress: Women = 926, Men = 1406; prior to COVID-19 sample for functional psychobiosocial states and dysfunctional psychobiosocial states: Women = 70, Men = 181; during COVID-19 sample for perceived stress, functional, and dysfunctional psychobiosocial states: Women = 595, Men = 537. Perceived stress could range between 0 and 40; functional/dysfunctional psychobiosocial states could range between 0 and 4.

(di Fronso et al., 2020)

5. Perspective taking
- Closed sporting facilities (64%)
6. Evaluation & Farewell
- Missing social contacts (37%)
  - Staying in shape (26%)
  - Issues concerning motivation (24%)
  - Missing social contacts in the sport context (20%)
- (N = 95; Lautenbach, Leisterer et al., 2020)

## Stress due to the COVID19 pandemic

1. Welcome & Introduction *Findings. Table 1. Focus points and themes*

2. Knowledge acquisition

3. Knowledge transfer

4. Knowledge application

5. Perspective taking

6. Evaluation & Farewell

| Themes                   | Focus Points              | f  | %     |
|--------------------------|---------------------------|----|-------|
| Thoughts                 | Thoughts about the future | 12 | 31.5  |
|                          | Self-awareness            | 10 | 26.3  |
|                          | Value awareness           | 9  | 23.6  |
|                          | Thoughts about the past   | 7  | 18.4  |
|                          | Total                     | 38 | 100   |
| Emotions                 | Anxiety                   | 12 | 40    |
|                          | Anger                     | 4  | 13.3  |
|                          | Longing                   | 4  | 13.3  |
|                          | Depression                | 3  | 10    |
|                          | Sadness                   | 2  | 6.66  |
|                          | Stress                    | 2  | 6.66  |
|                          | Confidence                | 1  | 3.33  |
|                          | Loneliness                | 1  | 3.33  |
|                          | Fear                      | 1  | 3.33  |
|                          | Total                     | 30 | 100   |
| Management Strategies    | Physical Training         | 17 | 40.47 |
|                          | Mental Training           | 14 | 33.33 |
|                          | Take up a hobby           | 7  | 16.66 |
|                          | Trainer support           | 4  | 9.52  |
| Performance Expectations | Total                     | 42 | 100   |
|                          | Decreased                 | 13 | 72.22 |
|                          | Constant                  | 3  | 16.66 |
|                          | Increased                 | 2  | 11.11 |
|                          | Total                     | 18 | 100   |

(N = 18; Interview study; Tinganz, 2020)

## Comprehensibility

1. Welcome & Introduction **Examples**
  2. Knowledge acquisition
  3. **Knowledge transfer** Regularly repeated psychoeducation to achieve a mental health literacy within the athletic community<sup>4</sup>
  4. Knowledge application
  5. Perspective taking
  6. Evaluation & Farewell
- Retrieving information from sources of high credibility<sup>2</sup>
- Adapting timetables, not goals<sup>1</sup>

## Manageability

1. Welcome & Introduction *Examples*
2. Knowledge acquisition  
Learning how to use relaxation techniques<sup>2, 4</sup>
3. **Knowledge transfer**
4. Knowledge application  
Exploration of what keeps athletes effective and disciplined in training<sup>2</sup>
5. Perspective taking
6. Evaluation & Farewell  
Including family and friends as social-emotional support network<sup>4</sup>

## Meaningfulness

1. Welcome & Introduction ***Examples***

2. Knowledge acquisition

Investing time into neglected but important things that support their goal achievement<sup>1</sup>

3. **Knowledge transfer**

4. Knowledge application

Developing a mental health policy<sup>4</sup>

5. Perspective taking

6. Evaluation & Farewell

If needed, here is space for your instructions.

1. Welcome & Introduction
2. Knowledge acquisition
3. **Knowledge transfer**
4. Knowledge application
5. Perspective taking
6. Evaluation & Farewell

If needed, here is space for your instructions.

1. Welcome & Introduction
2. Knowledge acquisition
3. Knowledge transfer
- 4. Knowledge application**
5. Perspective taking
6. Evaluation & Farewell

If needed, here is space for your instructions.

1. Welcome & Introduction
2. Knowledge acquisition
3. Knowledge transfer
4. Knowledge application
5. **Perspective taking**
6. Evaluation & Farewell



If needed, here is space for your instructions.

1. Welcome & Introduction
2. Knowledge acquisition
3. Knowledge transfer
4. Knowledge application
5. Perspective taking
6. **Evaluation & Farewell**

- Antonovsky, A. (1993a). "Gesundheitsforschung versus Krankheitsforschung [Health Research versus Research of Illness ] ," in *Psychosomatische Gesundheit*, ed. A. Franke and M. Broda (Tübingen: dgvt-Verlag), 3-14.
- Antonovsky, A. (1993b). The structure and properties of the coherence sense. *SoC. Sci. Med.* 36:6, 725-733.
- Di Fronso, S., Costa, S., Montesano, C., Di Gruttola, F., Giorgio Ciofi, E., Morgilli, L., Robazza, C., and Bertollo, M. (2020). The effects of COVID-19 pandemic on perceived stress and psychobiosocial states in Italian athletes. *Int. J. Sport Exerc. Psychol.* doi: 10.1080/1612197X.2020.1802612
- Lautenbach, F., Leisterer, S., Walter, N., Kronenberg, L., Manges, T., Leis, O., Pelikan, V., Gebhardt, S., and Elbe, Anne-Marie. (submitted). Athletes' motivation to exercise, stress, and coping during the corona crisis. *Front. Psychol.*
- Samuel, R.D., Tenenbaum, G., and Galily, Y. (2020). The 2020 Coronavirus pandemic as a change event in sport performers' careers: Conceptual and applied practice considerations. *Front. Psychol.* 11:567966. doi: 10.3389/fpsyg.2020.567966
- Stambulova, N. (2011). The mobilization model of counseling athletes in crisis-transitions: An educational intervention tool. *J. Sport Psychol. Action* 2:3. doi: 10.1080/21520704.2011.598223
- Tingaz, E.O. (2020). The psychological impact of COVID-19 pandemic on elite athletes, management strategies and post-pandemic performance expectations: A semi structured interview study. *Int. J. Educ. Res. Inn.* 15, 73-81. doi: 10.46661/ijeri.4863



UNIVERSITÄT  
LEIPZIG

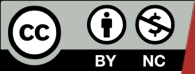

**GOOD BYE!**

Thank you very much for your participation,  
contributions and idea exchanges!

Stay resilient and be well!

**Contacts:**

Sascha Leisterer & Dr. Franziska Lautenbach

[sascha.leisterer@uni-leipzig.de](mailto:sascha.leisterer@uni-leipzig.de) | [franziska.lautenbach@uni-leipzig.de](mailto:franziska.lautenbach@uni-leipzig.de)

Leipzig University (Germany)

Faculty of Sports Science | Institute of Sport Psychology and Sport Pedagogy | Department of Sport Psychology

Jahnallee 59, 04109 Leipzig, Germany

<http://www.spowi.uni-leipzig.de/fakultaet/institute-fachgebiete/psychpaed/sportpsychologie/>
