# Supplementary material for: Development of a Salutogenesis Workshop for SPPs to Help Them, Their Athletes, and the Athlete’s Entourage Better Cope With Uncertainty During the COVID-19 Pandemic
Source: PubMed Central journal article supplement (PMC8177668; doi:10.3389/fpsyg.2021.612264), 2021-05-21
Supplement: Data_Sheet_2.pdf [file Data_Sheet_2.pdf]

## Supplement A

Workshop procedure: Schedule, learning objectives, content, didactical methods, and material.

| Time<br>(approx.)<br><br>(min) | Workshop phase            | Learning objectives<br>(el vs. il)<br>Participants are able to ...                                                                                                                                                                                                                | Content                                                                                                                                                                                                                                                            | Didactical method/<br>organization                                                                                                                                | Material                                            |
|--------------------------------|---------------------------|-----------------------------------------------------------------------------------------------------------------------------------------------------------------------------------------------------------------------------------------------------------------------------------|--------------------------------------------------------------------------------------------------------------------------------------------------------------------------------------------------------------------------------------------------------------------|-------------------------------------------------------------------------------------------------------------------------------------------------------------------|-----------------------------------------------------|
| Prior to<br>workshop           | Preparation               |                                                                                                                                                                                                                                                                                   | For Workshop guidance:<br>Inform participants about<br>workshop framework,<br>provide material, and<br>collect questions<br>beforehand                                                                                                                             |                                                                                                                                                                   | Literature,<br>guidelines,<br>slides                |
| 30 min                         | Welcome &<br>introduction | il: ...create a meaningful relevance<br>by...<br>- ...reflecting their own situation<br>during the COVID19 pandemic.<br>- ...reflecting their own emotional<br>reactions during the COVID19<br>pandemic.<br>- ...empathizing with participants'<br>emotions and affective states. | - Clarification/repetition of<br>workshop schedule and<br>learning objectives<br>- Introduction of<br>participants by answering<br>the questions: "How is<br>work during the COVID19-<br>pandemic?", "How do you<br>personally deal with the<br>COVID19-pandemic?" | Individual self-reflection<br>about coping during the<br>pandemic<br><br>Silent reflections on mind-<br>maps regarding experiences<br>and coping with uncertainty | For reflections<br>on mind-maps:<br>Papers, pencils |
| 60 min                         | Knowledge<br>acquisition  | el: ...enhance comprehensiveness<br>by...<br>- ...describing and defining the<br>salutogenetic approach.<br>- ...understanding its relevance for<br>health promotion and performance<br>enhancement.<br>- ...differentiating the three SoC                                        | - Definition of: stress and<br>stressors, SoC, resources<br>- Introduction of<br>salutogenetic model and<br>SoC elements<br>- Overview: Uncertainty<br>research in sports                                                                                          | Lectures about the theory<br>of Salutogenesis and<br>related research                                                                                             | PPT slides                                          |

| components |                       |                                                                                                                                                                                                                                                                                                                                                                                                                                                                                                                                                                                                         |                                                                                                                                                                                                    |                                                                                                                                                                                              |                                                                                                                                                   |
|------------|-----------------------|---------------------------------------------------------------------------------------------------------------------------------------------------------------------------------------------------------------------------------------------------------------------------------------------------------------------------------------------------------------------------------------------------------------------------------------------------------------------------------------------------------------------------------------------------------------------------------------------------------|----------------------------------------------------------------------------------------------------------------------------------------------------------------------------------------------------|----------------------------------------------------------------------------------------------------------------------------------------------------------------------------------------------|---------------------------------------------------------------------------------------------------------------------------------------------------|
| 20 min     | Break                 |                                                                                                                                                                                                                                                                                                                                                                                                                                                                                                                                                                                                         |                                                                                                                                                                                                    |                                                                                                                                                                                              |                                                                                                                                                   |
| 40 min     | Knowledge transfer    | <p>el: ...enhance comprehensiveness by...</p> <ul style="list-style-type: none"> <li>- ...assigning different strategies to the SoC components.</li> <li>- ...checking psychological counseling guidelines and strategies (e.g., Bertollo et al., 2020) published during the COVID19 pandemic for completeness.</li> </ul>                                                                                                                                                                                                                                                                              | <ul style="list-style-type: none"> <li>- Evaluation of strategies to cope with stressors</li> <li>- Evaluation of psychological counseling guidelines to cope with the COVID19-pandemic</li> </ul> | <p>Exercises in small groups, especially evaluations of psychological counseling guidelines and strategies</p>                                                                               | <p>Collection of psychological counseling guidelines as handouts</p> <p>For evaluation:<br/>Index cards, Flip Chart markers, Flip Chart paper</p> |
| 60 min     | Knowledge application | <p>el: ...enhance comprehensiveness by...</p> <ul style="list-style-type: none"> <li>- ...developing new coping strategies based on to the salutogenetic approach.</li> <li>- ...identifying and explaining differences in coping strategies according to the SoC components.</li> <li>- ...discussing the usefulness of the developed strategies for the elite sport context.</li> </ul> <p>il: ...enhance SoC manageability by reflecting their own experienced strategies and their effectiveness according to the salutogenetic approach (backspin to self-reflection during the introduction).</p> | <ul style="list-style-type: none"> <li>- Development and discussion regarding new coping strategies</li> </ul>                                                                                     | <p>Brainstorming with the entire group or in small groups, e.g., to collect coping strategies according to Salutogenesis</p>                                                                 | <p>For brainstorming:<br/>Index cards, Flip Chart markers, Flip Chart paper</p>                                                                   |
|            |                       |                                                                                                                                                                                                                                                                                                                                                                                                                                                                                                                                                                                                         |                                                                                                                                                                                                    | <p>Exercises in small groups, especially development of further coping strategies</p> <p>Group discussions about potentials and barriers of a salutogenetic approach in sport psychology</p> | <p>For discussion (collecting potentials and barriers): Flip Chart paper, Flip Chart markers, strips</p>                                          |
| 60 min     | Break                 |                                                                                                                                                                                                                                                                                                                                                                                                                                                                                                                                                                                                         |                                                                                                                                                                                                    |                                                                                                                                                                                              |                                                                                                                                                   |
| 90 min     | Perspective taking    | <p>el: ...enhance manageability by ...</p> <ul style="list-style-type: none"> <li>- ...putting themselves in the place</li> </ul>                                                                                                                                                                                                                                                                                                                                                                                                                                                                       |                                                                                                                                                                                                    | <p>Role plays to apply coping strategies in sport</p>                                                                                                                                        |                                                                                                                                                   |

|        |                                                                                                                                                                                                                                                                                                                                                                                                                                                                       |                                     |                                                                                                                        |                                                                                                              |
|--------|-----------------------------------------------------------------------------------------------------------------------------------------------------------------------------------------------------------------------------------------------------------------------------------------------------------------------------------------------------------------------------------------------------------------------------------------------------------------------|-------------------------------------|------------------------------------------------------------------------------------------------------------------------|--------------------------------------------------------------------------------------------------------------|
|        | <p>(“manageability”)</p> <p>of the athlete /learner.<br/> - ...by considering different barriers during the learning process.</p> <p>il: ...enhance meaningfulness by<br/> - ...reflecting on their own emotional reactions and evaluations of the coping strategies discussed in the workshop.</p> <p>il: ...enhance meaningfulness by<br/> - ...reflecting on their own emotional reactions and evaluations of the coping strategies discussed in the workshop.</p> |                                     | <p>psychological practice</p> <p>Silent reflections on mind-maps regarding experiences and coping with uncertainty</p> | <p>Mind-maps from the beginning, pencils</p> <p>For reflections on mind-maps: Papers, pencils</p>            |
| 30 min | Conclusion                                                                                                                                                                                                                                                                                                                                                                                                                                                            | <p>- Feedback<br/> - Evaluation</p> | <p>Group reflections/flashlights to recapitulate workshop parts</p>                                                    | <p>Any object for flashlight recapitulation: ball, card, ...</p> <p>Feedback / evaluation questionnaires</p> |

Notes: el = explicit learning: “comprehensiveness”; il = implicit learning: “meaningfulness”, SoC = Sense of Coherence
